# Supplementary material for: Hydrochemical and Isotopic Difference of Spring Water Depending on Flow Type in a Stratigraphically Complex Karst Area of South Korea
Source: Frontiers journal article supplement (doi:10.3389/feart.2021.712865), 2021-08-24
Supplement: Data_Sheet_1.docx [file Data_Sheet_1.docx]

Supplementary Material

# Supplementary Figures and Tables

## Supplementary Figures


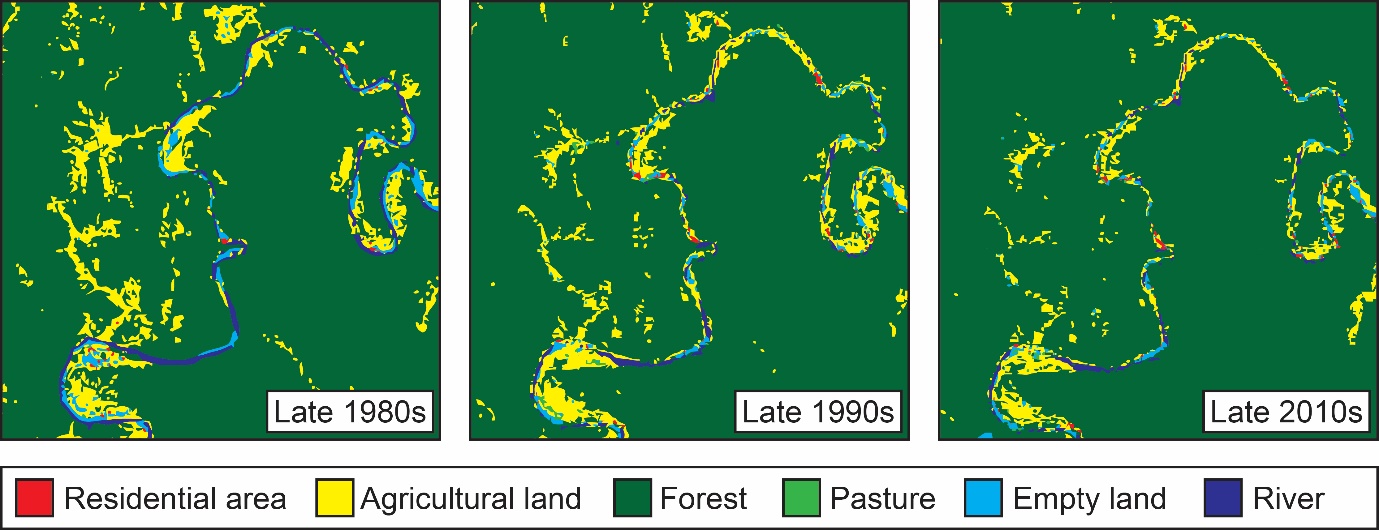


**Supplementary Figure 1** No significant changes in land use since the late 1980s.

**Supplementary Figure 2** Land use map in the late 1990s with sampling locations. Springs were divided into diffuse flow-dominated Type Ⅰ and conduit flow-dominant Type Ⅱ when sampled based on the manner by which the discharge occurred (i.e., low and high, respectively).


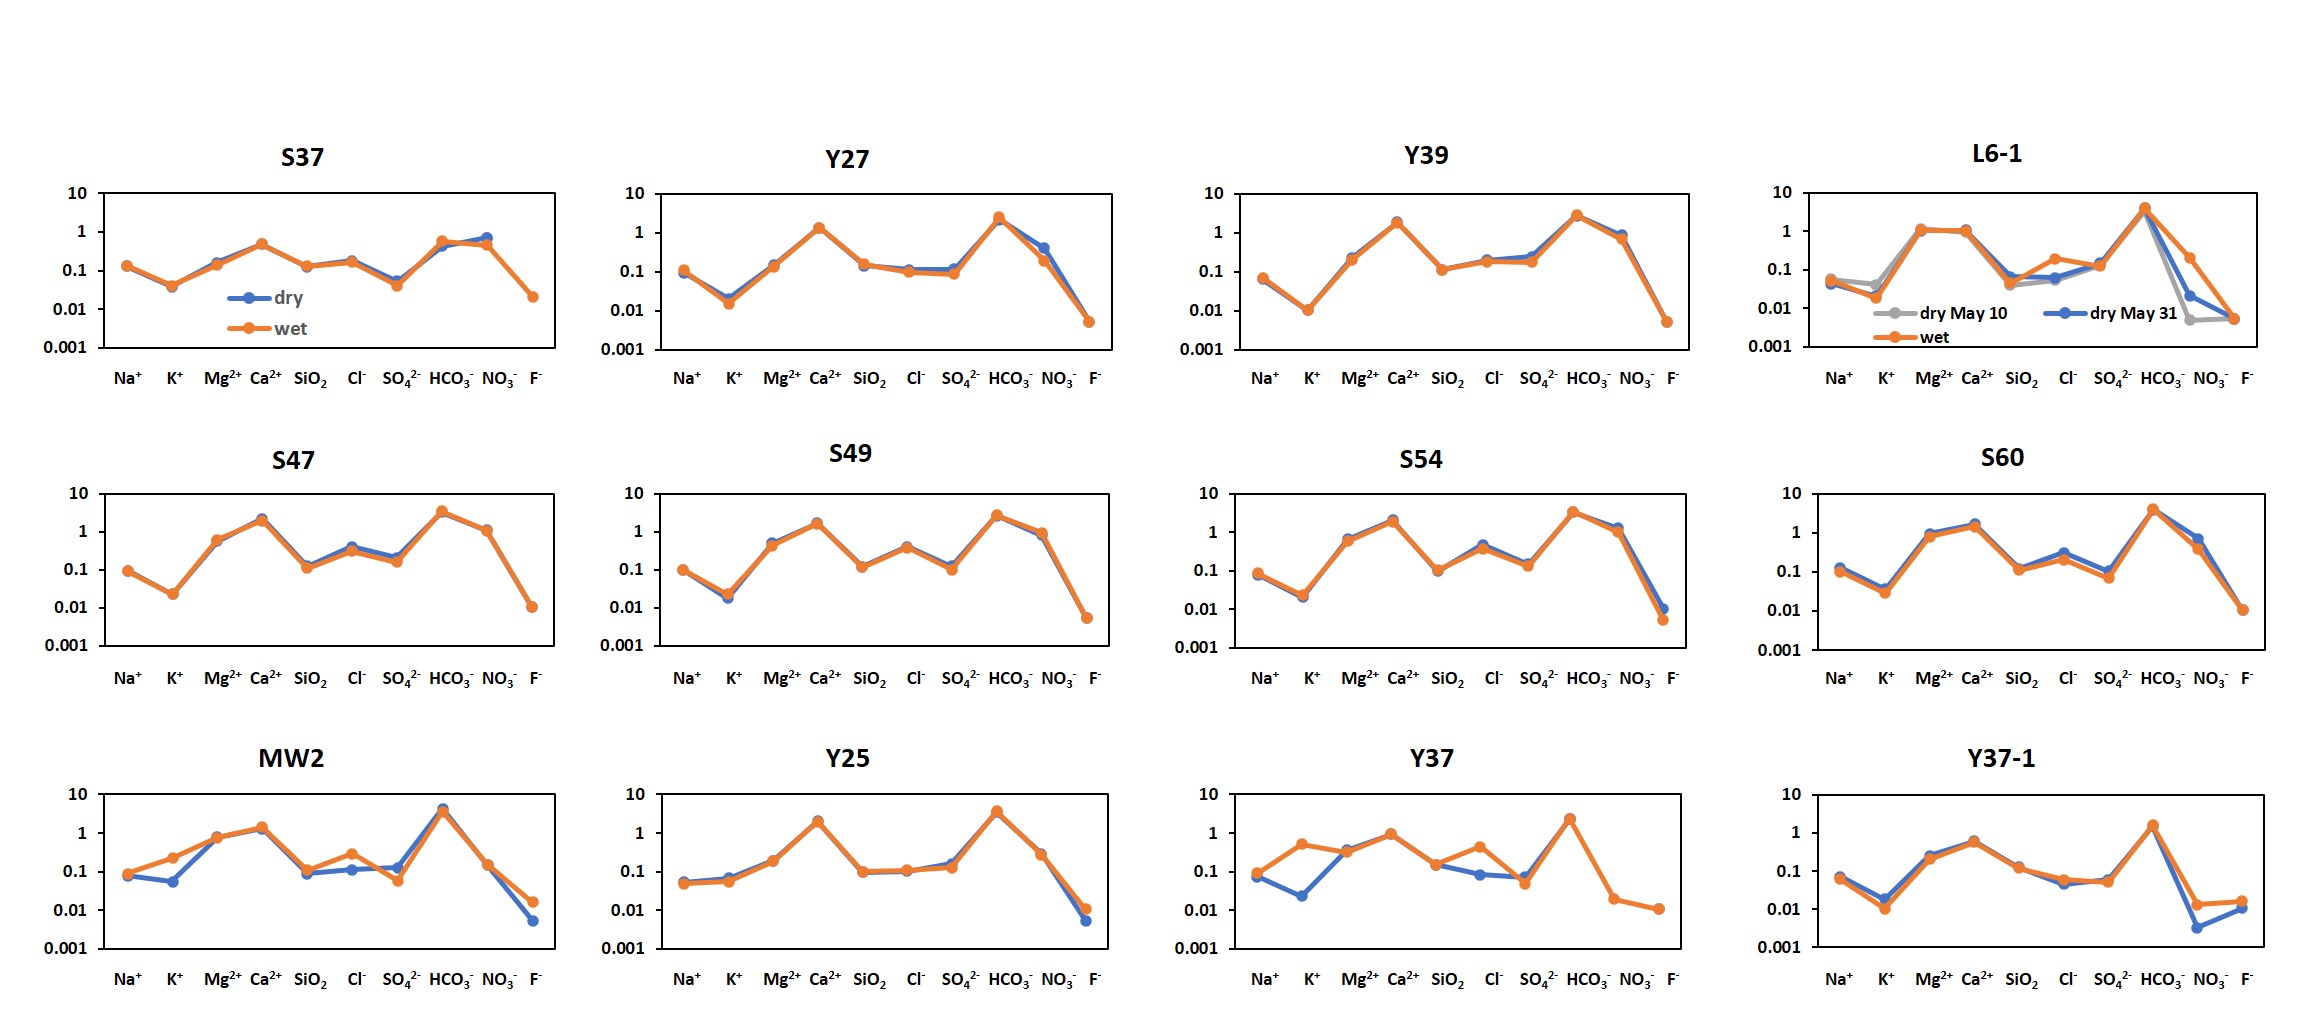


**Supplementary Figure 3.** Concentrations of major compositions in dry and wet season in 1999.The first, second and third row show the Type Ⅰ springs (n=3; S37, Y27, Y39) and deep groundwater (n=1; L6-1), Type Ⅱ springs (n=4), and shallow groundwater (n=4), respectively.


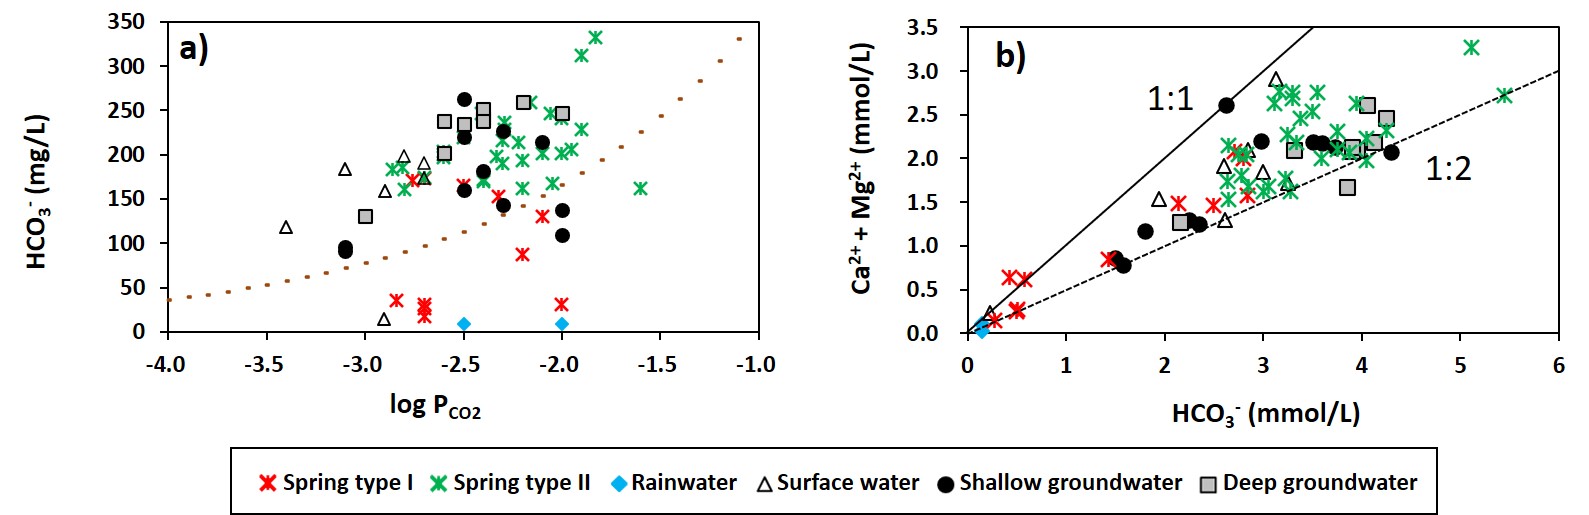


**Supplementary Figure 4** (a) *P*CO2 vs. HCO3-; (b) Ca2+ + Mg2+ vs. HCO3-. In (a), the dotted curve indicates the amount of bicarbonate that can dissolve under open system conditions at 15 ℃. In (b), the 1:1 line represents the enhanced dissolution of carbonate rocks by nitrification, while the 1:2 line represents the dissolution of carbonate minerals by H2CO3 derived from the dissolution of CO2 (Kim et al, 2019).


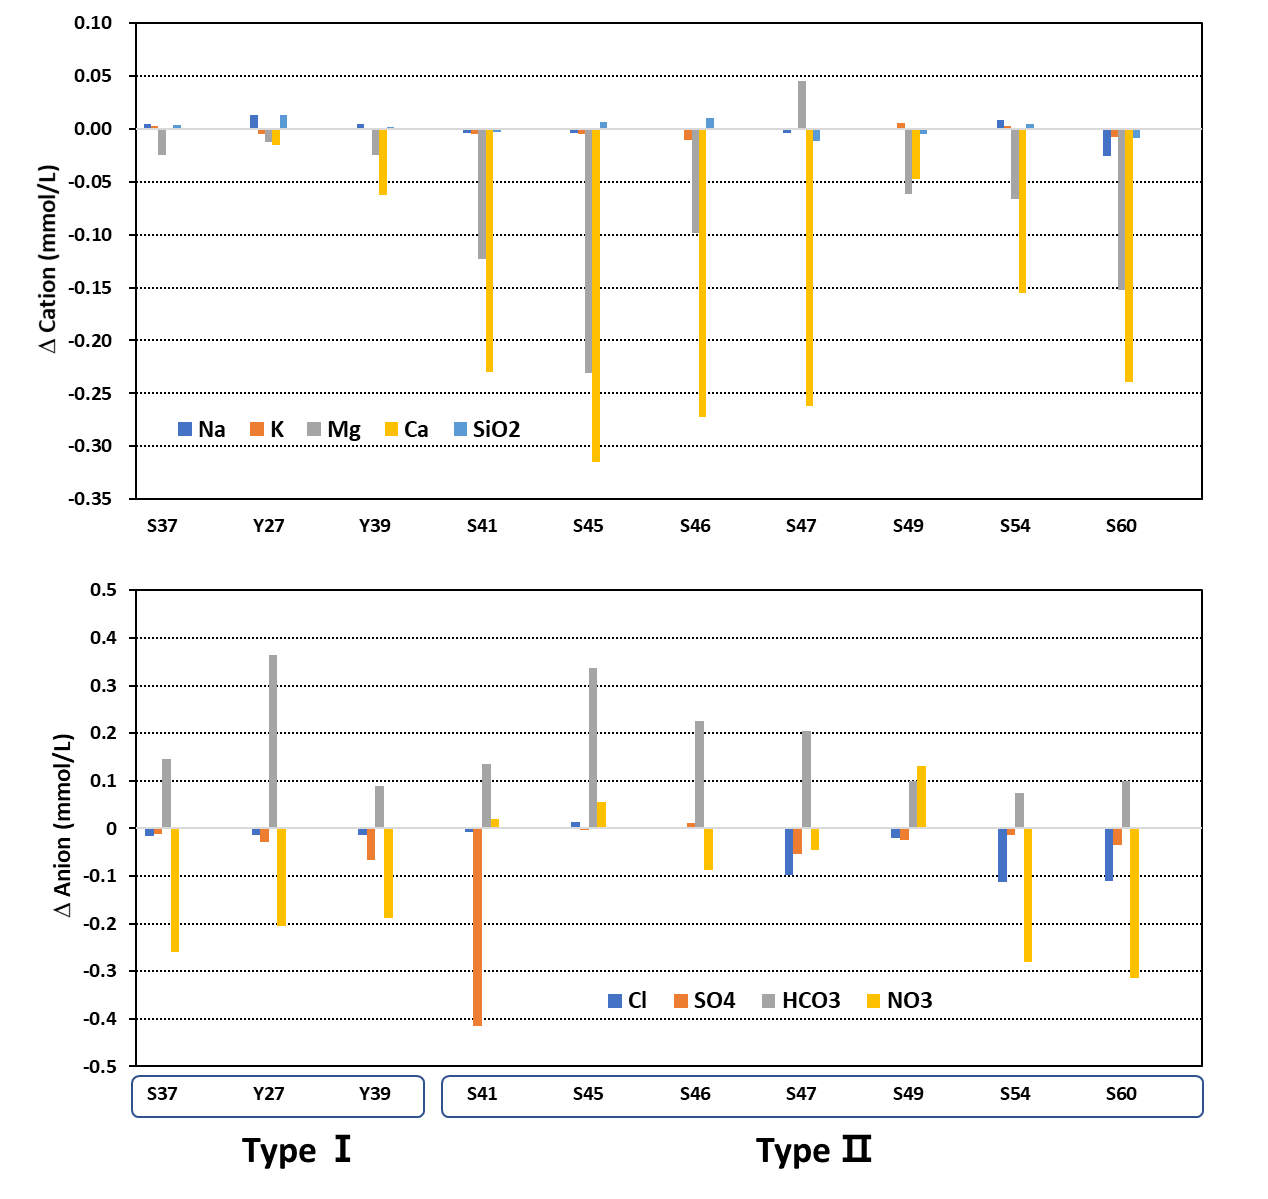


**Supplementary Figure 5.** The variation of major cation (up) and anion (down) compositions between dry and wet season in 1999. Δ = (concentration in wet season) – (concentration in dry season).

## Supplementary Tables

**Supplementary Table 1.** Water samples collected in 1999. Samples collected in both dry and wet season are in bold.

| Water type | Sample name | Lithology | Sampling date | Water type | Sample name | Lithology | Sampling date |
| --- | --- | --- | --- | --- | --- | --- | --- |
| Rainwater  (n = 2) | **Rain** |  | **6/1/99** | Spring water  (Type Ⅰ,  n = 11) | S10 | Omg. | 6/10/99 |
| **Rain** |  | **7/24/99** | **S37** | **Jbc.** | **6/2/99** |
| Surface water  (n = 8) | R1 | Oy. | 5/10/99 | **S37** | **Jbc.** | **7/24/99** |
| **R2** | **Oy.** | **5/10/99** | S62-1 | Oy. | 5/31/99 |
| **R2** | **Oy.** | **7/25/99** | S68-1 | Jbc. | 6/1/99 |
| ST1 | Oy. | 5/10/99 | S68-2 | Jbc. | 6/10/99 |
| **ST2** | **Oy.** | **5/10/99** | S68-3 | Jbc. | 6/10/99 |
| **ST2** | **Oy.** | **7/25/99** | **Y27** | **Ogl.** | **6/2/99** |
| ST3 | Omg. | 6/11/99 | **Y27** | **Ogl.** | **7/24/99** |
| ST4 | Jbc. | 6/10/99 | **Y39** | **Oy.** | **6/1/99** |
| Shallow groundwater  (n = 11) | L3 | Oy. | 7/25/99 | **Y39** | **Oy.** | **7/24/99** |
| **MW2** | **Oy.** | **6/1/99** | Spring water  (Type Ⅱ,  n = 30) | C6 | Oy. | 6/3/99 |
| **MW2** | **Oy.** | **7/24/99** | S2 | Omg. | 6/11/99 |
| Y4 | Jbc. | 6/2/99 | S23 | Oy. | 6/2/99 |
| **Y25** | **Ogl.** | **6/3/99** | S31 | Oy. | 6/2/99 |
| **Y25** | **Ogl.** | **7/24/99** | S35 | Oy. | 6/2/99 |
| Y28 | Oy. | 6/1/99 | S40 | Oy. | 7/23/99 |
| **Y37** | **Jbc.** | **6/1/99** | **S41** | **Oy.** | **5/10/99** |
| **Y37** | **Jbc.** | **7/24/99** | **S41** | **Oy.** | **5/31/99** |
| **Y37-1** | **Jbc.** | **6/10/99** | **S41** | **Oy.** | **7/23/99** |
| **Y37-1** | **Jbc.** | **7/24/99** | S44 | Oy. | 7/26/99 |
| Deep groundwater  (n = 9) | L6 | Oy. | 5/31/99 | **S45** | **Oy.** | **5/10/99** |
| **L6-1** | **Oy.** | **5/10/99** | **S45** | **Oy.** | **7/23/99** |
| **L6-1** | **Oy.** | **5/31/99** | **S46** | **Oy.** | **5/10/99** |
| **L6-1** | **Oy.** | **7/25/99** | **S46** | **Oy.** | **7/24/99** |
| L6-2 | Oy. | 5/10/99 | **S47** | **Oy.** | **6/3/99** |
| L6-2 | Oy. | 5/31/99 | **S47** | **Oy.** | **7/24/99** |
| MW1 | Oy. | 7/25/99 | S48 | Oy. | 6/1/99 |
| MW3 | Jbc. | 7/26/99 | **S49** | **Oy.** | **5/31/99** |
| MW7 | Jbc. | 6/11/99 | **S49** | **Oy.** | **7/24/99** |
|  |  |  |  | S49-1 | Oy. | 7/26/99 |
|  |  |  | **S54** | **Oy.** | **6/11/99** |
| Lithology:  Oy. = Yeongheung Formation  (limestone and dolomitic limestone),  Omg. = Maggol Limestone,  Jbc. = Bansong Formation (sandstone and shale), including Jbs in Figure 1a.  Ogl. = Kosong Limestone.  (the white area at the east in Figure 1a) | | | | **S54** | **Oy.** | **7/26/99** |
| S54-1 | Oy. | 6/11/99 |
| **S60** | **Oy.** | **6/3/99** |
| **S60** | **Oy.** | **7/26/99** |
| S60-1 | Oy. | 7/26/99 |
| S61 | Oy. | 7/26/99 |
| S64 | Omg. | 6/11/99 |
| S69 | Oy. | 7/26/99 |
| Y25-1 | Ogl. | 6/2/99 |
